# Supplementary material for: Impairment of human neural crest cell migration by prolonged exposure to interferon-beta
Source: PubMed Central journal article supplement (PMC5608792; doi:10.1007/s00204-017-1966-1), 2017-04-01
Supplement: 204_2017_1966_MOESM2_ESM.pdf [file 204_2017_1966_MOESM2_ESM.pdf]

# Supplemental Material

## Impairment of human neural crest cell migration by prolonged exposure to interferon-beta

Giorgia Pallocca, Johanna Nyffeler, Xenia Dolde, Marianna Grinberg, Gerhard Gstraunthaler, Tanja Waldmann, Jörg Rahnenführer, Agapios Sachinidis and Marcel Leist

### Table of contents

- **Supplemental material, Figure S1** STR profiles for H9, H9-D11 and reference H9 page 2
- **Supplemental material, Figure S2** Primer list page 3
- **Supplemental material, Figure S3** Differentially expressed genes (DEG) of NCC treated with interferon beta (500 pM) compared to control page 4
- **Supplemental material, Figure S4** mRNA expression level of differentiation markers in presence of increasing IFN $\beta$  concentrations page 10
- **Supplemental material, Figure S5** RNA expression level of integrins and cadherins in NCC upon exposure to IFN $\beta$  page 11
- **Supplemental material, Figure S6** Phosphorylation level of different pathway-specific kinases in presence of IFN $\beta$  page 12
- **Supplemental material, Table 1** Differentially expressed genes (DEG) of NCC treated with interferon beta (500 pM) compared to control (excel document)

| <b>Cell type</b><br><b>STR</b> | <b>H9</b><br>(performed on<br>February 2017) | <b>H9-DII1</b><br>(performed on<br>February 2017) | <b>H9</b><br>(Josephson et<br>al 2006) |
|--------------------------------|----------------------------------------------|---------------------------------------------------|----------------------------------------|
| <i>Amelogenin</i>              | X                                            | X                                                 | X                                      |
| <i>CSF1PO</i>                  | 11                                           | 11                                                | 11                                     |
| <i>D5S818</i>                  | 11, 12                                       | 11, 12                                            | 11, 12                                 |
| <i>D13S317</i>                 | 9                                            | 9                                                 | 9                                      |
| <i>D7S820</i>                  | 9, 11                                        | 9, 11                                             | 9, 11                                  |
| <i>D16S539</i>                 | 12, 13                                       | 12, 13                                            | 12, 13                                 |
| <i>vWA</i>                     | 17                                           | 17                                                | 17                                     |
| <i>THO1</i>                    | 9.3                                          | 9.3                                               | 9.3                                    |
| <i>TPOX</i>                    | 10, 11                                       | 10, 11                                            | 10, 11                                 |
| <i>Penta D</i>                 | 9, 13                                        | 9, 13                                             |                                        |
| <i>D8S1179</i>                 | 8, 14                                        | 8, 14                                             |                                        |
| <i>FGA</i>                     | 26, 28                                       | 26, 28                                            |                                        |
| <i>D3S1358</i>                 | 13, 16                                       | 13, 16                                            |                                        |
| <i>D21S11</i>                  | 30                                           | 30                                                |                                        |
| <i>D18S51</i>                  | 12.3, 13                                     | 12.3, 13                                          |                                        |
| <i>Penta E</i>                 | 11, 14                                       | 11, 14                                            |                                        |

## Supplementary figure S1

**Fig S1:** STR profiles for H9, H9-DII1 and reference H9 (Josephson et al 2006)

| <b>Gene name</b> | <b>Sense primer sequence</b> | <b>Antisense primer sequence</b> |
|------------------|------------------------------|----------------------------------|
| STAT1            | CCTCCTGTCACAGCTGGATGATC      | GCCTGATTAATCTCTGGGCGTT           |
| STAT2            | GAAGTCGCGACCAGAGCCAT         | CAGCTTCCTGCCAGTTCTGG             |
| IRF1             | ACCTCTGCCTTCTTCCCTCTTC       | ATCCAGATGAGCCCCGGGATTT           |
| IRF9             | GCGACAGCCTGGACAGCAAC         | GGCAGCATCCTGGTCCTCCC             |
| SP100            | TGACAGGCTGCTCTATGACATTGTA    | GTACACCACTCTCTGTACAGGGACC        |
| TLR3             | TTTCGAGAGTGCCGTCTATTTG       | GGCTAACAGTGCACCTTGGTGGT          |
| CXCL10           | ACCTCCAGTCTCAGCACCATGAA      | ACGTGGACAAAATTGGCTTGCAG          |
| CXCL11           | CTTGGCTGTGATATTGTGTGCTACA    | GGGATTTAGGCATCGTTGTCCTTTA        |
| GAPDH            | ATGGAGAAGGCTGGGGCTCA         | AGTGATGGCATGGACTGTGGTCAT         |
| MSX1             | ACACAAGACGAACCGTAAGCC        | CACATGGGCCGTGTAGAGTC             |
| SOX9             | AGGAAGCTCGCGGACCAGTA         | CTGCCCGTTCTTCACCGACT             |
| COL2A2           | GTCTACCCCAATCCAGCAA          | CTTCAGGGCAGTGTACGTGA             |
| SNAI2            | CGCGCTCCTTCTGGTCAAG          | CATTGGGTAGCTGCTGGGCGTGG          |
| HDAC1            | CACCCGGAGGAAAGTCTG           | GGGCGATAGATTTCCATTTTT            |
| NRP1             | GCGGACCCGGAGAAGGGAGA         | TCCGGAGCCTGAATCAGCCA             |
| PAX3             | GAACACGTTCGACAAAAGCA         | GCACACAAGCAAATGGAATG             |

## Supplementary figure S2

**Fig S2:** Nucleotide base sequences of the primers used for qPCR analysis

| Supplementary Table S1          |                    |                     | 500 pM Interferon beta          |                    |                     |                                 |                    |                     |
|---------------------------------|--------------------|---------------------|---------------------------------|--------------------|---------------------|---------------------------------|--------------------|---------------------|
| <u>Probe set/<br/>Gene name</u> | <u>Fold change</u> | <u>Adj. p value</u> | <u>Probe set/<br/>Gene name</u> | <u>Fold change</u> | <u>Adj. p value</u> | <u>Probe set/<br/>Gene name</u> | <u>Fold change</u> | <u>Adj. p value</u> |
| ADAR                            | 1.98               | <0.001              | C19orf66                        | 10.18              | <0.001              | CTSZ                            | 1.89               | 0.005               |
| ADCY7                           | 1.83               | <0.001              | C1R                             | 2.52               | <0.001              | CX3CL1                          | 2.04               | <0.001              |
| AGT                             | 2.03               | 0.011               | C1S                             | 2.70               | 0.003               | CXCL10                          | 31.95              | <0.001              |
| AGTRAP                          | 2.38               | <0.001              | C1S                             | 3.22               | <0.001              | CXCL11                          | 44.00              | <0.001              |
| AGTRAP                          | 1.85               | 0.001               | C3AR1                           | 1.86               | 0.007               | CXCL11                          | 44.23              | <0.001              |
| ANKRD45                         | 1.84               | 0.014               | C5orf56                         | 2.20               | 0.001               | CXCL16                          | 1.95               | 0.022               |
| APOBEC3B                        | 1.93               | 0.003               | C5orf56                         | 2.49               | 0.002               | CYP4V2                          | 2.42               | <0.001              |
| APOBEC3G                        | 9.75               | <0.001              | C5orf56                         | 5.29               | <0.001              | DDX58                           | 23.12              | <0.001              |
| APOL1                           | 3.68               | <0.001              | CARD16                          | 11.39              | <0.001              | DDX58                           | 18.07              | <0.001              |
| APOL2                           | 3.34               | <0.001              | CASP1                           | 8.33               | <0.001              | DDX58                           | 11.35              | <0.001              |
| APOL3                           | 3.61               | <0.001              | CASP1                           | 11.13              | <0.001              | DDX60                           | 6.94               | <0.001              |
| APOL6                           | 5.05               | <0.001              | CASP1                           | 7.74               | <0.001              | DDX60L                          | 4.37               | <0.001              |
| APOL6                           | 17.11              | <0.001              | CASP1                           | 9.45               | <0.001              | DDX60L                          | 11.66              | <0.001              |
| APOL6                           | 7.97               | <0.001              | CASP1                           | 18.07              | <0.001              | DHRS2                           | 2.96               | <0.001              |
| APOL6                           | 7.04               | <0.001              | CASP4                           | 2.02               | <0.001              | DHRS2                           | 6.99               | <0.001              |
| ARHGAP15                        | 1.98               | 0.004               | CASP7                           | 2.33               | <0.001              | DHX58                           | 1.95               | 0.003               |
| ATP10A                          | 6.23               | <0.001              | CCL5                            | 2.73               | 0.002               | DIEXF                           | 1.92               | 0.020               |
| B2M                             | 3.21               | <0.001              | CCL5                            | 2.05               | 0.010               | DLL1                            | 2.44               | 0.003               |
| B2M                             | 4.88               | <0.001              | CCR1                            | 5.45               | <0.001              | DSP                             | 2.34               | <0.001              |
| B2M                             | 5.14               | <0.001              | CCR1                            | 2.95               | 0.001               | DTX3L                           | 22.31              | <0.001              |
| BLZF1                           | 2.17               | 0.006               | CD274                           | 3.24               | <0.001              | ECM2                            | 2.00               | 0.006               |
| BLZF1                           | 1.91               | 0.001               | CD55                            | 2.18               | 0.002               | EIF2AK2                         | 3.96               | <0.001              |
| BNIP3                           | 2.23               | 0.001               | CEACAM1                         | 3.95               | <0.001              | EIF2AK2                         | 3.67               | <0.001              |
| BNIP3                           | 2.15               | <0.001              | CFB                             | 8.66               | <0.001              | EIF2AK2                         | 3.92               | <0.001              |
| BST2                            | 23.84              | <0.001              | CHMP5                           | 1.94               | 0.001               | ELOVL3                          | 1.97               | 0.002               |
| BTC                             | 2.17               | 0.007               | CLDN1                           | 2.08               | <0.001              | EPSTI1                          | 39.77              | <0.001              |
| BTN3A1                          | 2.07               | 0.003               | CLDN23                          | 3.49               | <0.001              | EPSTI1                          | 28.55              | <0.001              |
| BTN3A1                          | 2.67               | 0.001               | CLEC2B                          | 3.55               | <0.001              | ERAP1                           | 2.26               | <0.001              |
| BTN3A2                          | 4.27               | <0.001              | CLEC7A                          | 2.18               | 0.006               | ERAP1                           | 3.36               | 0.009               |
| BTN3A2                          | 3.55               | <0.001              | CLIC2                           | 2.17               | 0.006               | ERAP1                           | 3.00               | <0.001              |
| BTN3A3                          | 3.58               | <0.001              | CMPK2                           | 32.95              | <0.001              | ERAP2                           | 5.21               | <0.001              |
| BTN3A3                          | 5.74               | <0.001              | CNP                             | 2.29               | <0.001              | ERAP2                           | 5.79               | <0.001              |
| C19orf66                        | 5.37               | <0.001              | COL15A1                         | 2.07               | 0.003               | ERAP2                           | 2.19               | 0.008               |
| C19orf66                        | 3.72               | <0.001              | CTSS                            | 2.87               | 0.001               | ERG                             | 1.93               | 0.026               |
| C19orf66                        | 10.18              | <0.001              | CTSS                            | 2.54               | 0.001               | ETV7                            | 1.87               | 0.003               |

| Supplementary Table S1          |                    |                     | 500 pM Interferon beta          |                    |                     |                                 |                    |                     |
|---------------------------------|--------------------|---------------------|---------------------------------|--------------------|---------------------|---------------------------------|--------------------|---------------------|
| <u>Probe set/<br/>Gene name</u> | <u>Fold change</u> | <u>Adj. p value</u> | <u>Probe set/<br/>Gene name</u> | <u>Fold change</u> | <u>Adj. p value</u> | <u>Probe set/<br/>Gene name</u> | <u>Fold change</u> | <u>Adj. p value</u> |
| FAM26F                          | 2.60               | 0.001               | HLA-C                           | 9.66               | <0.001              | IFITM1                          | 15.31              | <0.001              |
| FBXO6                           | 2.53               | 0.002               | HLA-C                           | 4.61               | <0.001              | IFITM2                          | 2.28               | <0.001              |
| FNIP1                           | 2.17               | 0.019               | HLA-C                           | 9.10               | <0.001              | IFITM3                          | 2.89               | <0.001              |
| FTSJD2                          | 2.05               | <0.001              | HLA-C                           | 8.50               | <0.001              | IGF1                            | 1.80               | 0.007               |
| GBP1                            | 10.50              | <0.001              | HLA-E                           | 3.00               | <0.001              | IL15                            | 3.20               | 0.003               |
| GBP1                            | 8.49               | <0.001              | HLA-E                           | 3.15               | <0.001              | IL18BP                          | 2.80               | <0.001              |
| GBP1                            | 7.23               | <0.001              | HLA-E                           | 4.14               | <0.001              | IL20RB                          | 2.67               | <0.001              |
| GBP1                            | 1.85               | 0.014               | HLA-F                           | 5.42               | <0.001              | IL4I1                           | 1.97               | 0.001               |
| GBP2                            | 3.10               | 0.003               | HLA-F                           | 5.45               | <0.001              | IL7                             | 1.88               | 0.001               |
| GBP2                            | 3.33               | 0.001               | HLA-G                           | 4.18               | <0.001              | INHBA                           | 2.26               | 0.046               |
| GBP3                            | 4.74               | <0.001              | HLA-G                           | 5.33               | <0.001              | INHBE                           | 2.74               | 0.008               |
| GCH1                            | 4.43               | <0.001              | HLA-G                           | 6.17               | <0.001              | IRF1                            | 2.47               | <0.001              |
| GCNT1                           | 1.81               | 0.001               | HLA-G                           | 3.88               | <0.001              | IRF1                            | 2.30               | <0.001              |
| GDF15                           | 1.81               | 0.002               | HLA-J                           | 2.50               | <0.001              | IRF7                            | 8.18               | <0.001              |
| GIMAP2                          | 3.61               | <0.001              | IDO1                            | 3.02               | <0.001              | IRF9                            | 4.88               | <0.001              |
| GLRX                            | 1.82               | 0.001               | IFI16                           | 3.92               | <0.001              | ISG15                           | 34.81              | <0.001              |
| GMPR                            | 5.21               | <0.001              | IFI16                           | 5.05               | <0.001              | ISG20                           | 10.01              | <0.001              |
| GNB4                            | 2.28               | <0.001              | IFI16                           | 4.38               | <0.001              | ISG20                           | 9.06               | <0.001              |
| GRIA1                           | 2.22               | 0.001               | IFI27                           | 230.11             | <0.001              | KIAA1755                        | 3.00               | <0.001              |
| GRIA1                           | 2.15               | 0.019               | IFI30                           | 3.46               | <0.001              | KMO                             | 1.84               | 0.007               |
| H1F0                            | 2.21               | <0.001              | IFI35                           | 18.98              | <0.001              | LAMP3                           | 5.55               | <0.001              |
| HCP5                            | 2.03               | <0.001              | IFI44                           | 18.25              | <0.001              | LAP3                            | 4.88               | <0.001              |
| HELZ2                           | 5.22               | <0.001              | IFI44                           | 10.18              | <0.001              | LGALS3BP                        | 13.51              | <0.001              |
| HELZ2                           | 1.95               | 0.001               | IFI44L                          | 5.38               | <0.001              | LGMN                            | 1.86               | <0.001              |
| HERC5                           | 56.94              | <0.001              | IFI6                            | 49.89              | <0.001              | LNPEP                           | 2.07               | 0.008               |
| HERC6                           | 43.41              | <0.001              | IFIH1                           | 14.55              | <0.001              | LNPEP                           | 1.90               | 0.005               |
| HES4                            | 3.43               | <0.001              | IFIH1                           | 6.72               | <0.001              | LOC100132707                    | 1.85               | 0.004               |
| HIST1H2AC                       | 2.25               | <0.001              | IFIH1                           | 154.52             | <0.001              | LOC100310756                    | 1.94               | 0.005               |
| HIST1H2BD                       | 1.83               | 0.003               | IFIT1                           | 66.60              | <0.001              | LOC100506274                    | 2.28               | 0.002               |
| HK2                             | 2.07               | <0.001              | IFIT2                           | 17.65              | <0.001              | LOC100507463                    | 7.66               | <0.001              |
| HLA-A                           | 5.09               | <0.001              | IFIT2                           | 46.20              | <0.001              | LOC100507535                    | 3.42               | <0.001              |
| HLA-A                           | 5.27               | <0.001              | IFIT3                           | 31.84              | <0.001              | LOC283501                       | 1.90               | 0.001               |
| HLA-B                           | 6.43               | <0.001              | IFIT3                           | 38.99              | <0.001              | LOC284561                       | 2.00               | 0.002               |
| HLA-B                           | 7.81               | <0.001              | IFIT5                           | 4.90               | <0.001              | LOC339260                       | 2.08               | 0.004               |
| HLA-B                           | 6.26               | <0.001              | IFIT5                           | 5.04               | <0.001              | LOC643401                       | 1.86               | 0.003               |

| Supplementary Table S1          |                        | 500 pM Interferon beta      |                                     |                        |                             |                                     |                        |                             |
|---------------------------------|------------------------|-----------------------------|-------------------------------------|------------------------|-----------------------------|-------------------------------------|------------------------|-----------------------------|
| <u>Probe set/<br/>Gene name</u> | <u>Fold<br/>change</u> | <u>Adj.<br/>p<br/>value</u> | <u>Probe set/<br/>Gene<br/>name</u> | <u>Fold<br/>change</u> | <u>Adj.<br/>p<br/>value</u> | <u>Probe set/<br/>Gene<br/>name</u> | <u>Fold<br/>change</u> | <u>Adj.<br/>p<br/>value</u> |
| LY6E                            | 2.76                   | <0.001                      | 216565_x_at                         | 4.23                   | <0.001                      | 58916_at                            | 2.83                   | <0.001                      |
| LYSMD2                          | 2.32                   | 0.002                       | 217604_at                           | 2.03                   | <0.001                      | NAMPT                               | 2.10                   | 0.011                       |
| MET                             | 1.87                   | 0.005                       | 218280_x_at                         | 2.12                   | <0.001                      | NAPA                                | 1.81                   | 0.009                       |
| MFNG                            | 1.81                   | 0.002                       | 219545_at                           | 1.81                   | 0.004                       | NLRC5                               | 7.17                   | <0.001                      |
| MICB                            | 3.14                   | <0.001                      | 220445_s_at                         | 2.52                   | 0.012                       | NMI                                 | 8.08                   | <0.001                      |
| MLKL                            | 3.35                   | <0.001                      | 221044_s_at                         | 6.23                   | <0.001                      | NOD2                                | 1.85                   | <0.001                      |
| MMP13                           | 3.02                   | <0.001                      | 222631_at                           | 1.97                   | <0.001                      | NT5C3                               | 2.96                   | <0.001                      |
| MOCOS                           | 2.36                   | <0.001                      | 224175_s_at                         | 2.17                   | 0.001                       | NT5E                                | 1.89                   | 0.023                       |
| MOV10                           | 1.91                   | 0.002                       | 226040_at                           | 2.48                   | <0.001                      | NT5E                                | 2.07                   | <0.001                      |
| MT1E                            | 2.19                   | 0.001                       | 226725_at                           | 2.17                   | <0.001                      | OAS1                                | 62.08                  | <0.001                      |
| MT1E                            | 2.05                   | 0.004                       | 230233_at                           | 1.94                   | 0.006                       | OAS1                                | 87.76                  | <0.001                      |
| MT1F                            | 2.65                   | <0.001                      | 230314_at                           | 7.89                   | <0.001                      | OAS2                                | 28.03                  | <0.001                      |
| MT1H                            | 3.18                   | <0.001                      | 232150_at                           | 2.20                   | <0.001                      | OAS2                                | 3.28                   | <0.001                      |
| MT1P2                           | 2.80                   | <0.001                      | 232375_at                           | 5.46                   | 0.001                       | OAS2                                | 25.29                  | <0.001                      |
| MT1X                            | 3.53                   | <0.001                      | 232544_at                           | 1.92                   | 0.017                       | OAS3                                | 13.26                  | <0.001                      |
| MT2A                            | 3.42                   | <0.001                      | 232615_at                           | 2.01                   | 0.003                       | OAS3                                | 5.92                   | <0.001                      |
| MX1                             | 90.51                  | <0.001                      | 233050_at                           | 2.71                   | <0.001                      | OASL                                | 11.02                  | <0.001                      |
| MX2                             | 19.74                  | <0.001                      | 235157_at                           | 8.00                   | <0.001                      | OASL                                | 7.60                   | <0.001                      |
| MYD88                           | 2.53                   | <0.001                      | 235456_at                           | 3.33                   | <0.001                      | OPTN                                | 1.97                   | <0.001                      |
| MYL12A                          | 1.86                   | 0.005                       | 235543_at                           | 1.96                   | 0.003                       | OR52K3P                             | 3.45                   | <0.001                      |
| 1552703_s_at                    | 12.56                  | <0.001                      | 235681_at                           | 3.05                   | <0.001                      | OSMR                                | 2.40                   | 0.005                       |
| 1561180_at                      | 1.99                   | 0.011                       | 236692_at                           | 1.84                   | 0.003                       | PARP12                              | 14.52                  | <0.001                      |
| 1563075_s_at                    | 2.81                   | 0.010                       | 237105_at                           | 2.46                   | 0.001                       | PARP14                              | 13.20                  | <0.001                      |
| 1563357_at                      | 1.90                   | 0.010                       | 238743_at                           | 2.67                   | 0.002                       | PARP6                               | 1.83                   | 0.005                       |
| 1566887_x_at                    | 1.98                   | 0.002                       | 239587_at                           | 21.50                  | <0.001                      | PARP9                               | 15.41                  | <0.001                      |
| 201601_x_at                     | 13.90                  | <0.001                      | 239979_at                           | 5.04                   | <0.001                      | PARP9                               | 3.80                   | <0.001                      |
| 204820_s_at                     | 3.89                   | <0.001                      | 239988_at                           | 1.92                   | 0.004                       | PATL1                               | 1.86                   | <0.001                      |
| 205871_at                       | 2.11                   | 0.001                       | 240382_at                           | 2.55                   | 0.001                       | PCGF5                               | 2.07                   | 0.001                       |
| 208078_s_at                     | 3.87                   | <0.001                      | 241916_at                           | 10.19                  | <0.001                      | PCGF5                               | 2.08                   | <0.001                      |
| 208523_x_at                     | 1.82                   | 0.015                       | 241956_at                           | 1.91                   | 0.003                       | PCGF5                               | 2.25                   | <0.001                      |
| 209446_s_at                     | 1.81                   | 0.011                       | 242667_at                           | 2.00                   | 0.002                       | PCGF5                               | 2.48                   | 0.004                       |
| 214290_s_at                     | 2.24                   | <0.001                      | 242878_at                           | 3.28                   | <0.001                      | PDZD2                               | 2.13                   | 0.001                       |
| 214455_at                       | 2.20                   | 0.004                       | 243271_at                           | 4.45                   | <0.001                      | PHF11                               | 4.01                   | <0.001                      |
| 214808_at                       | 2.67                   | 0.005                       | 243299_at                           | 2.16                   | 0.008                       | PHF11                               | 2.06                   | 0.001                       |
| 214995_s_at                     | 2.29                   | 0.001                       | 243576_at                           | 2.90                   | 0.002                       | PIK3AP1                             | 6.28                   | <0.001                      |

| Supplementary Table S1          |                        |                             | 500 pM Interferon beta          |                        |                             |                                 |                        |                             |
|---------------------------------|------------------------|-----------------------------|---------------------------------|------------------------|-----------------------------|---------------------------------|------------------------|-----------------------------|
| <u>Probe set/<br/>Gene name</u> | <u>Fold<br/>change</u> | <u>Adj.<br/>p<br/>value</u> | <u>Probe set/<br/>Gene name</u> | <u>Fold<br/>change</u> | <u>Adj.<br/>p<br/>value</u> | <u>Probe set/<br/>Gene name</u> | <u>Fold<br/>change</u> | <u>Adj.<br/>p<br/>value</u> |
| PLA1A                           | 2.30                   | <0.001                      | RNF213                          | 3.37                   | <0.001                      | SP100                           | 8.24                   | <0.001                      |
| PLEKHG4B                        | 1.95                   | 0.022                       | RSAD2                           | 66.83                  | <0.001                      | SP100                           | 9.77                   | <0.001                      |
| PLSCR1                          | 7.95                   | <0.001                      | RSAD2                           | 91.63                  | <0.001                      | SP100                           | 15.37                  | <0.001                      |
| PLSCR1                          | 8.47                   | <0.001                      | RTP4                            | 12.42                  | <0.001                      | SP100                           | 4.20                   | <0.001                      |
| PML                             | 2.36                   | 0.001                       | SAMD9                           | 30.36                  | <0.001                      | SP100                           | 16.16                  | <0.001                      |
| PML                             | 1.82                   | 0.002                       | SAMD9                           | 149.90                 | <0.001                      | SP100                           | 4.22                   | <0.001                      |
| PML                             | 2.45                   | <0.001                      | SAMD9L                          | 16.90                  | <0.001                      | SP110                           | 8.78                   | <0.001                      |
| PML                             | 2.40                   | <0.001                      | SAMD9L                          | 9.08                   | <0.001                      | SP110                           | 8.35                   | <0.001                      |
| PNPT1                           | 4.66                   | <0.001                      | SAMD9L                          | 18.79                  | <0.001                      | SP110                           | 10.96                  | <0.001                      |
| PPM1K                           | 3.24                   | <0.001                      | SAMHD1                          | 19.66                  | <0.001                      | SP110                           | 13.30                  | <0.001                      |
| PPM1K                           | 3.75                   | <0.001                      | SAMHD1                          | 20.08                  | <0.001                      | SP110                           | 17.98                  | <0.001                      |
| PPM1K                           | 4.44                   | <0.001                      | SAMHD1                          | 13.97                  | <0.001                      | SP140L                          | 3.40                   | <0.001                      |
| PPM1K                           | 2.49                   | 0.001                       | SAMHD1                          | 12.76                  | <0.001                      | SPATS2L                         | 2.32                   | 0.002                       |
| PSMB8                           | 12.04                  | <0.001                      | SAMHD1                          | 11.87                  | <0.001                      | SPATS2L                         | 2.20                   | <0.001                      |
| PSMB9                           | 32.37                  | <0.001                      | SCARB2                          | 1.90                   | <0.001                      | SPTBN5                          | 1.98                   | 0.002                       |
| PSME1                           | 2.50                   | <0.001                      | SCARB2                          | 1.91                   | 0.002                       | SQRDL                           | 3.17                   | <0.001                      |
| PSME2                           | 2.50                   | <0.001                      | SCIN                            | 1.90                   | 0.011                       | STAT1                           | 7.63                   | <0.001                      |
| RABGAP1L                        | 1.98                   | 0.001                       | SDPR                            | 1.84                   | 0.012                       | STAT1                           | 15.93                  | <0.001                      |
| RABGAP1L                        | 2.06                   | 0.003                       | SECTM1                          | 3.23                   | <0.001                      | STAT1                           | 8.25                   | <0.001                      |
| RARRES3                         | 4.11                   | <0.001                      | SELL                            | 1.92                   | 0.015                       | STAT1                           | 13.60                  | <0.001                      |
| RASGRP3                         | 2.82                   | 0.001                       | SERPINB9                        | 2.38                   | <0.001                      | STAT1                           | 10.98                  | <0.001                      |
| RBCK1                           | 2.09                   | <0.001                      | SERPING1                        | 3.19                   | <0.001                      | STAT1                           | 9.94                   | <0.001                      |
| RBM43                           | 1.88                   | <0.001                      | SLC15A3                         | 8.23                   | <0.001                      | STAT2                           | 3.09                   | <0.001                      |
| RBM43                           | 3.20                   | <0.001                      | SLC16A3                         | 2.50                   | 0.001                       | STC2                            | 2.15                   | 0.001                       |
| RET                             | 2.53                   | <0.001                      | SLC16A3                         | 2.49                   | 0.005                       | STON2                           | 2.65                   | <0.001                      |
| RHOC                            | 2.03                   | 0.008                       | SLC25A28                        | 1.85                   | 0.004                       | STON2                           | 2.13                   | 0.002                       |
| RIMBP2                          | 1.95                   | 0.002                       | SLC25A28                        | 1.87                   | 0.001                       | TAP1                            | 18.37                  | <0.001                      |
| RIMS2                           | 2.42                   | 0.001                       | SLC2A12                         | 1.81                   | 0.010                       | TAP2                            | 6.81                   | <0.001                      |
| RNF19B                          | 2.04                   | 0.001                       | SLC44A1                         | 1.94                   | 0.004                       | TAP2                            | 2.06                   | 0.001                       |
| RNF19B                          | 2.14                   | 0.006                       | SLC8A1                          | 1.85                   | 0.001                       | TAP2                            | 12.13                  | <0.001                      |
| RNF213                          | 7.63                   | <0.001                      | SLFN5                           | 3.09                   | 0.004                       | TAPBP                           | 2.34                   | 0.001                       |
| RNF213                          | 7.80                   | <0.001                      | SLFN5                           | 2.70                   | 0.002                       | TAPBPL                          | 2.19                   | 0.019                       |
| RNF213                          | 4.51                   | <0.001                      | SLFN5                           | 2.25                   | <0.001                      | TAPBPL                          | 2.06                   | <0.001                      |
| RNF213                          | 7.91                   | <0.001                      | SLFN5                           | 2.10                   | <0.001                      | TDRD7                           | 13.17                  | <0.001                      |
| RNF213                          | 6.64                   | <0.001                      | SMCHD1                          | 1.87                   | 0.002                       | TGFB2                           | 1.98                   | 0.003                       |

| Supplementary Table S1          |                        |                             | 500 pM Interferon beta          |                        |                             |                                 |                        |                             |
|---------------------------------|------------------------|-----------------------------|---------------------------------|------------------------|-----------------------------|---------------------------------|------------------------|-----------------------------|
| <u>Probe set/<br/>Gene name</u> | <u>Fold<br/>change</u> | <u>Adj.<br/>p<br/>value</u> | <u>Probe set/<br/>Gene name</u> | <u>Fold<br/>change</u> | <u>Adj.<br/>p<br/>value</u> | <u>Probe set/<br/>Gene name</u> | <u>Fold<br/>change</u> | <u>Adj.<br/>p<br/>value</u> |
| TGM2                            | 1.92                   | 0.003                       | USP18                           | 21.96                  | <0.001                      | GLS                             | 0.41                   | 0.001                       |
| TLR3                            | 11.21                  | <0.001                      | VDR                             | 1.87                   | 0.005                       | GLS                             | 0.41                   | 0.001                       |
| TMEM140                         | 2.48                   | <0.001                      | VSIG10L                         | 1.91                   | 0.012                       | HSD17B14                        | 0.50                   | 0.020                       |
| TMEM62                          | 2.15                   | 0.001                       | WARS                            | 3.26                   | <0.001                      | HSD17B14                        | 0.42                   | 0.002                       |
| TNFAIP6                         | 2.11                   | <0.001                      | WARS                            | 3.18                   | <0.001                      | HSD17B14                        | 0.46                   | 0.003                       |
| TNFAIP6                         | 1.94                   | 0.001                       | WDFY1                           | 1.96                   | <0.001                      | ITGA8                           | 0.54                   | 0.004                       |
| TNFSF10                         | 11.26                  | <0.001                      | XAF1                            | 79.48                  | <0.001                      | KCNK2                           | 0.53                   | 0.013                       |
| TNFSF10                         | 13.96                  | <0.001                      | XAF1                            | 48.30                  | <0.001                      | KDM5B-AS1                       | 0.54                   | <0.001                      |
| TNFSF10                         | 13.23                  | <0.001                      | XAF1                            | 4.33                   | <0.001                      | LINC00622                       | 0.34                   | <0.001                      |
| TNFSF13B                        | 6.05                   | <0.001                      | ZC3HAV1                         | 4.46                   | <0.001                      | LINC00645                       | 0.44                   | 0.001                       |
| TNFSF13B                        | 13.99                  | <0.001                      | ZC3HAV1                         | 6.49                   | <0.001                      | LOC100507303                    | 0.52                   | 0.001                       |
| TPD52                           | 1.90                   | 0.032                       | ZC3HAV1                         | 3.95                   | <0.001                      | LOC338620                       | 0.51                   | 0.001                       |
| TRANK1                          | 2.47                   | <0.001                      | ZCCHC2                          | 2.66                   | <0.001                      | LONRF2                          | 0.23                   | <0.001                      |
| TREX1                           | 2.32                   | <0.001                      | ZCCHC2                          | 2.74                   | <0.001                      | LONRF2                          | 0.38                   | 0.001                       |
| TRIM14                          | 2.53                   | 0.002                       | ZNFX1                           | 3.88                   | <0.001                      | LRPAP1                          | 0.52                   | 0.001                       |
| TRIM14                          | 9.04                   | <0.001                      | ACO1                            | 0.30                   | <0.001                      | LRRC3B                          | 0.52                   | <0.001                      |
| TRIM21                          | 3.71                   | <0.001                      | AGO1                            | 0.39                   | <0.001                      | 1556216_s_at                    | 0.54                   | 0.001                       |
| TRIM22                          | 4.22                   | <0.001                      | AGTR1                           | 0.51                   | 0.001                       | 1556306_at                      | 0.37                   | <0.001                      |
| TRIM25                          | 2.08                   | 0.001                       | AGTR1                           | 0.52                   | 0.002                       | 1558170_at                      | 0.47                   | 0.006                       |
| TRIM25                          | 6.42                   | <0.001                      | ARHGAP28                        | 0.55                   | 0.002                       | 1558605_at                      | 0.44                   | <0.001                      |
| TRIM38                          | 2.56                   | <0.001                      | ARRB1                           | 0.52                   | 0.004                       | 1559116_s_at                    | 0.49                   | 0.001                       |
| TRIM38                          | 2.90                   | <0.001                      | ATP5E                           | 0.55                   | 0.004                       | 1561511_at                      | 0.52                   | <0.001                      |
| TRIM38                          | 3.17                   | 0.001                       | ATP6                            | 0.52                   | 0.001                       | 210292_s_at                     | 0.43                   | <0.001                      |
| TRIM38                          | 2.15                   | 0.003                       | BICD1                           | 0.53                   | 0.002                       | 213486_at                       | 0.48                   | <0.001                      |
| TRIM5                           | 1.93                   | 0.001                       | C7orf41                         | 0.32                   | <0.001                      | 215128_at                       | 0.41                   | 0.001                       |
| TRIM5                           | 1.83                   | 0.024                       | CDH8                            | 0.55                   | 0.001                       | 215306_at                       | 0.45                   | <0.001                      |
| TRIM56                          | 2.89                   | <0.001                      | CLN8                            | 0.37                   | 0.002                       | 223707_at                       | 0.33                   | <0.001                      |
| TRIM6                           | 2.37                   | <0.001                      | CLN8                            | 0.24                   | 0.001                       | 224763_at                       | 0.52                   | 0.001                       |
| TRIM69                          | 3.79                   | <0.001                      | DANCR                           | 0.52                   | <0.001                      | 226587_at                       | 0.49                   | 0.001                       |
| TXNIP                           | 2.68                   | <0.001                      | EDN3                            | 0.53                   | 0.004                       | 226591_at                       | 0.43                   | 0.004                       |
| TXNIP                           | 2.42                   | <0.001                      | EIF3L                           | 0.54                   | 0.001                       | 228370_at                       | 0.48                   | <0.001                      |
| TXNIP                           | 2.59                   | <0.001                      | FABP4                           | 0.47                   | 0.013                       | 228740_at                       | 0.24                   | <0.001                      |
| UBA7                            | 4.02                   | <0.001                      | FAM172A                         | 0.55                   | 0.002                       | 229544_at                       | 0.36                   | <0.001                      |
| UBA7                            | 4.78                   | <0.001                      | GABRR1                          | 0.46                   | <0.001                      | 230248_x_at                     | 0.44                   | 0.001                       |
| UBE2L6                          | 5.11                   | <0.001                      | GLS                             | 0.45                   | 0.001                       | 231047_at                       | 0.53                   | 0.008                       |



| Supplementary Table S1          |                        |                         | 500 pM Interferon beta          |                        |                         |
|---------------------------------|------------------------|-------------------------|---------------------------------|------------------------|-------------------------|
| <u>Probe set/<br/>Gene name</u> | <u>Fold<br/>change</u> | <u>Adj.<br/>p value</u> | <u>Probe set/<br/>Gene name</u> | <u>Fold<br/>change</u> | <u>Adj.<br/>p value</u> |
| 235679_at                       | 0.50                   | 0.002                   | STRBP                           | 0.32                   | <0.001                  |
| 236032_at                       | 0.54                   | 0.002                   | THEMIS                          | 0.46                   | 0.003                   |
| 236330_at                       | 0.43                   | <0.001                  | TLE2                            | 0.55                   | <0.001                  |
| 237390_at                       | 0.45                   | <0.001                  | TLL2                            | 0.52                   | <0.001                  |
| 237419_at                       | 0.47                   | 0.002                   | TNFRSF10D                       | 0.39                   | 0.002                   |
| 238824_at                       | 0.43                   | 0.001                   | TNFRSF10D                       | 0.20                   | <0.001                  |
| 241156_at                       | 0.49                   | 0.001                   |                                 |                        |                         |
| 241407_at                       | 0.52                   | 0.031                   |                                 |                        |                         |
| 241772_at                       | 0.54                   | 0.002                   |                                 |                        |                         |
| 241873_at                       | 0.50                   | 0.001                   |                                 |                        |                         |
| 242523_at                       | 0.56                   | 0.002                   |                                 |                        |                         |
| 242928_at                       | 0.51                   | 0.001                   |                                 |                        |                         |
| 243918_at                       | 0.43                   | 0.002                   |                                 |                        |                         |
| NAA38                           | 0.54                   | 0.003                   |                                 |                        |                         |
| NANOS1                          | 0.52                   | 0.002                   |                                 |                        |                         |
| NFYA                            | 0.45                   | 0.004                   |                                 |                        |                         |
| NFYA                            | 0.24                   | <0.001                  |                                 |                        |                         |
| OTUD3                           | 0.50                   | 0.002                   |                                 |                        |                         |
| PAR5                            | 0.33                   | 0.005                   |                                 |                        |                         |
| PCBD2                           | 0.53                   | <0.001                  |                                 |                        |                         |
| PCDH20                          | 0.49                   | <0.001                  |                                 |                        |                         |
| PCDP1                           | 0.52                   | 0.014                   |                                 |                        |                         |
| PDE1A                           | 0.54                   | 0.009                   |                                 |                        |                         |
| PDE1A                           | 0.50                   | 0.001                   |                                 |                        |                         |
| PGAP1                           | 0.55                   | 0.003                   |                                 |                        |                         |
| PI15                            | 0.51                   | <0.001                  |                                 |                        |                         |
| PTGFR                           | 0.50                   | 0.002                   |                                 |                        |                         |
| PTGFR                           | 0.39                   | 0.007                   |                                 |                        |                         |
| RPS15A                          | 0.54                   | 0.001                   |                                 |                        |                         |
| SCN4B                           | 0.51                   | 0.002                   |                                 |                        |                         |
| SCN7A                           | 0.52                   | <0.001                  |                                 |                        |                         |
| SLC1A6                          | 0.52                   | 0.007                   |                                 |                        |                         |
| SMEK2                           | 0.51                   | 0.002                   |                                 |                        |                         |
| SPAG16                          | 0.54                   | 0.005                   |                                 |                        |                         |
| STEAP4                          | 0.48                   | 0.003                   |                                 |                        |                         |

### Supplementary figure S3 (6)

**Fig S2:** NCC were exposed for 48 h to IFN $\beta$  or to the respective solvent control. Then cells were harvested, and total RNA was extracted. Analysis was then performed using Affymetrix chip-based DNA microarray (Human genome U133 plus 2.0 arrays) with all standard normalization quality control procedures (see Materials and Methods). The differentially expressed probe sets for each compound, including fold changes and p values of the limma t test are listed.

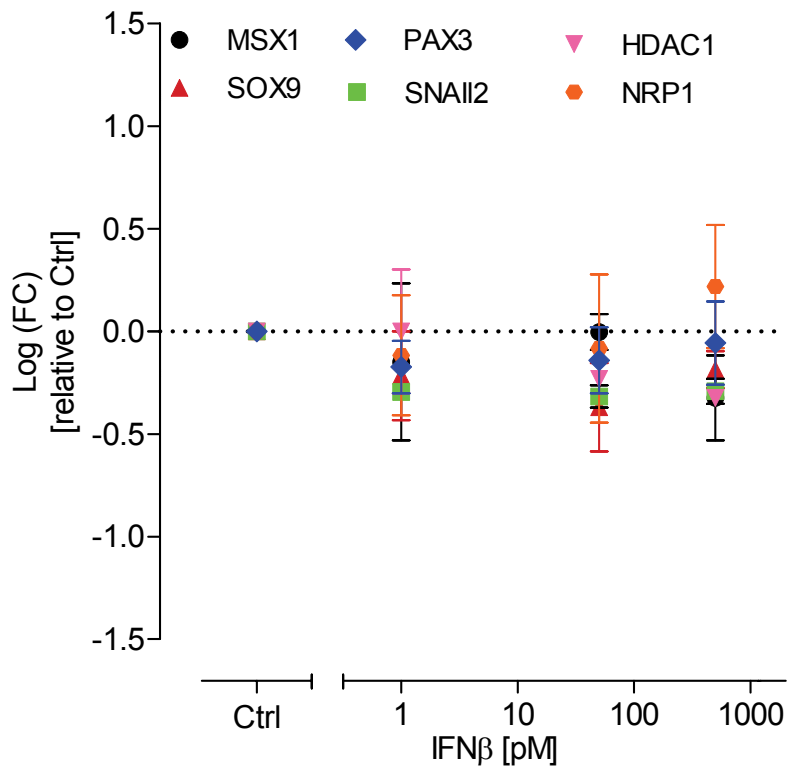

### Supplementary figure S4

**Fig S3:** NCC were exposed to IFN $\beta$  for 48 h at the indicated concentrations. Then cells were harvested, and total RNA was extracted and retro-transcribed. Effects on selected mRNAs were evaluated by qPCR. Expression levels were normalized against the housekeeping gene, GAPDH, and expressed relative to those of untreated cells (Ctrl). Data are from three independent experiments. Error bars indicate standard deviations (SD).

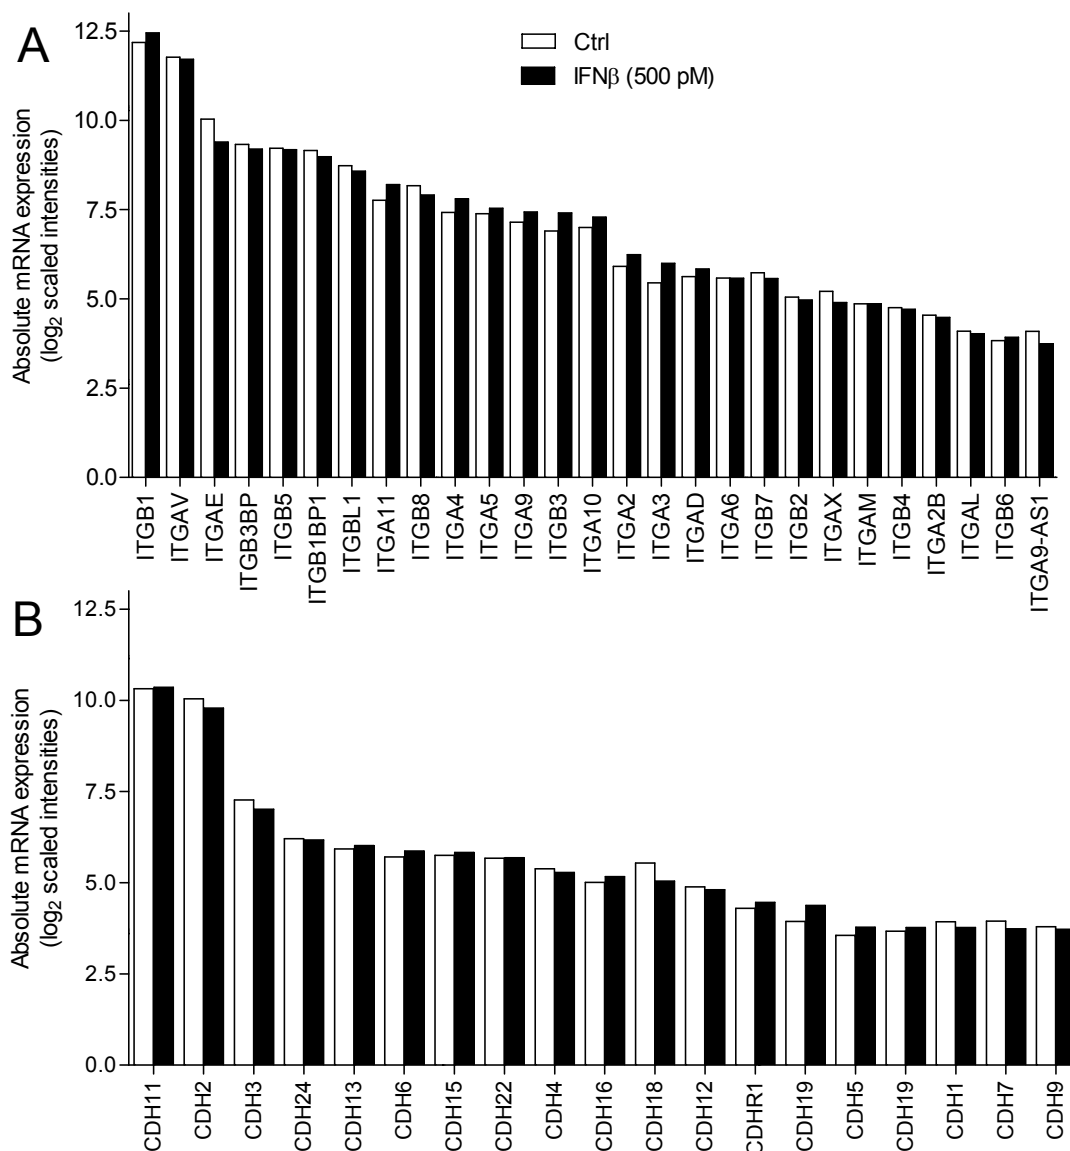

## Supplementary figure S5

**Fig S4:** NCC were exposed for 48 h to IFN $\beta$  or to the respective solvent control. Then cells were harvested, and total RNA was extracted. Analysis was then performed using Affymetrix chip-based DNA microarray (Human genome U133 plus 2.0 arrays) with all standard normalization quality control procedures (see Materials and Methods). **A** The absolute mRNA expression of integrins, and **B** cadherins was averaged among probesets and reported on the y axis. Data are fluorescence intensities of the average probe sets on a log<sub>2</sub> scale. Genes that are not expressed had a fluorescence level of 4-5.

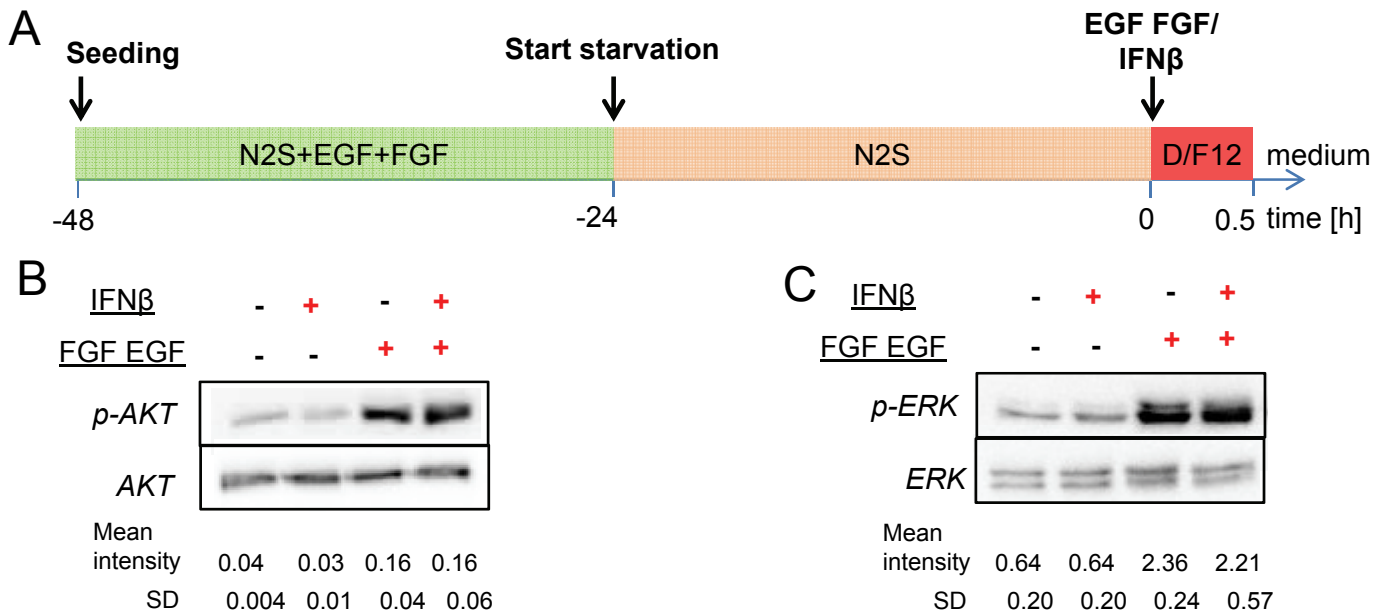

## Supplementary figure S6

**Fig S5:** **A** NCC were seeded and incubated for 24 h in N2S medium in the presence of the cytokines EGF (20 ng/ml) and FGF (20 ng/ml) (see Materials and Methods for NCC maintenance). Next, NCC were starved for 24 h in N2S medium in absence of cytokines. NCC were then exposed for 0.5 h to the growth factors (EGF+FGF) diluted in DMEM/F12 medium, in order to trigger known signaling cascades. The last step was examined in the presence of absence of IFN $\beta$  (500 pM) during the growth factor stimulation. After this, cells were harvested, and total protein samples prepared. **B, C** The amount of phosphorylated AKT (p-AKT) or phosphorylated ERK (p-ERK) was measured by western blot analysis (representative blots are shown). The mean intensity of each band normalized to the respective not phosphorylated forms (AKT or ERK)  $\pm$  SD is reported below each condition (n = 3)
